# Supplementary material
Source: MDPI journal article supplement (https://www.mdpi.com/2073-4344/12/9/1056)
Supplement: s1 [file s1]

## **Supporting Information**

### **Versatile Bifunctional and Supported IrNi Oxide Catalyst for Photoelectrochemical Water Splitting**

**Sifani Zavahir <sup>1</sup>, Umme Hafsa <sup>1,2</sup>, Hyunwoong Park <sup>3</sup> and Dong Suk Han <sup>1,2,\*</sup>**

<sup>1</sup> Center for Advanced Materials, Qatar University, Doha P.O. Box 2713, Qatar

<sup>2</sup> Department of Chemical Engineering, Qatar University, Doha P.O. Box 2713, Qatar

<sup>3</sup> School of Energy Engineering, Kyungpook National University, Daegu 702-701, Korea

\* Correspondence: dhan@qu.edu.qa

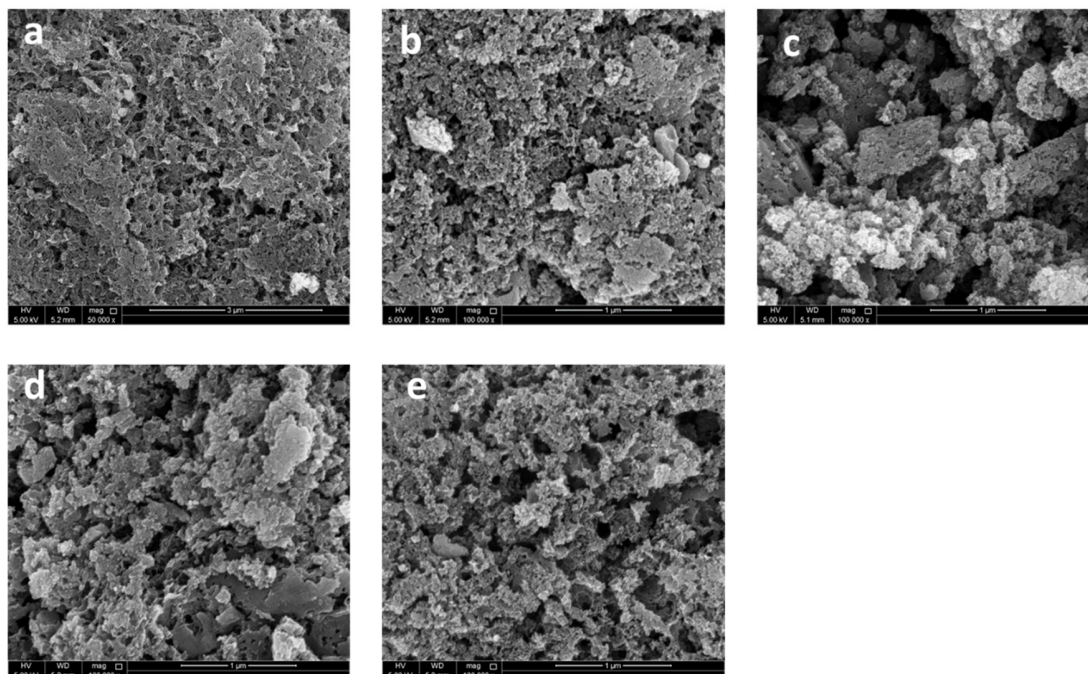

**Figure S1.** SEM images of (a) Ni@AC, (b) 1Ir4Ni@AC, (c) 1Ir1Ni@AC, (d) 4Ir1Ni@AC and (e) Ir@AC, scalar bar in the images refer to 1  $\mu\text{m}$ .

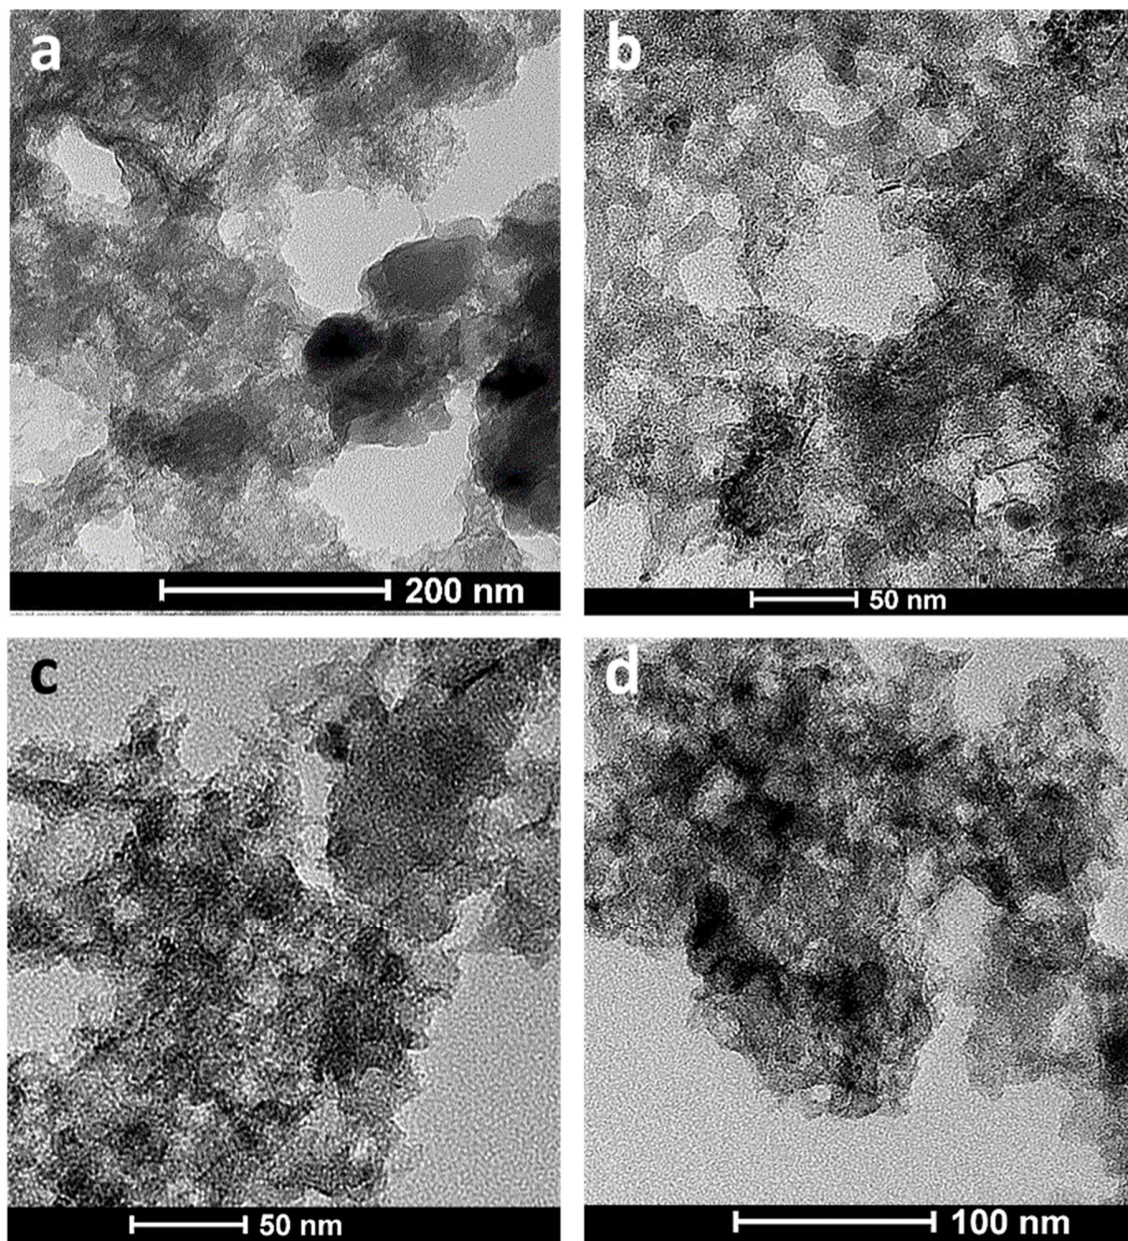

**Figure S2.** TEM images of (a) Ni@AC, (b) 1Ir4Ni@AC, (c) 1Ir1Ni@AC, and (d) Ir@AC, scaler bar is given in each image.

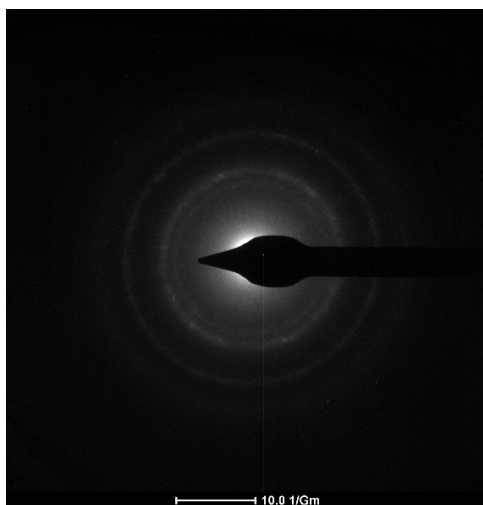

**Figure S3.** SAED ring pattern of Ni@AC

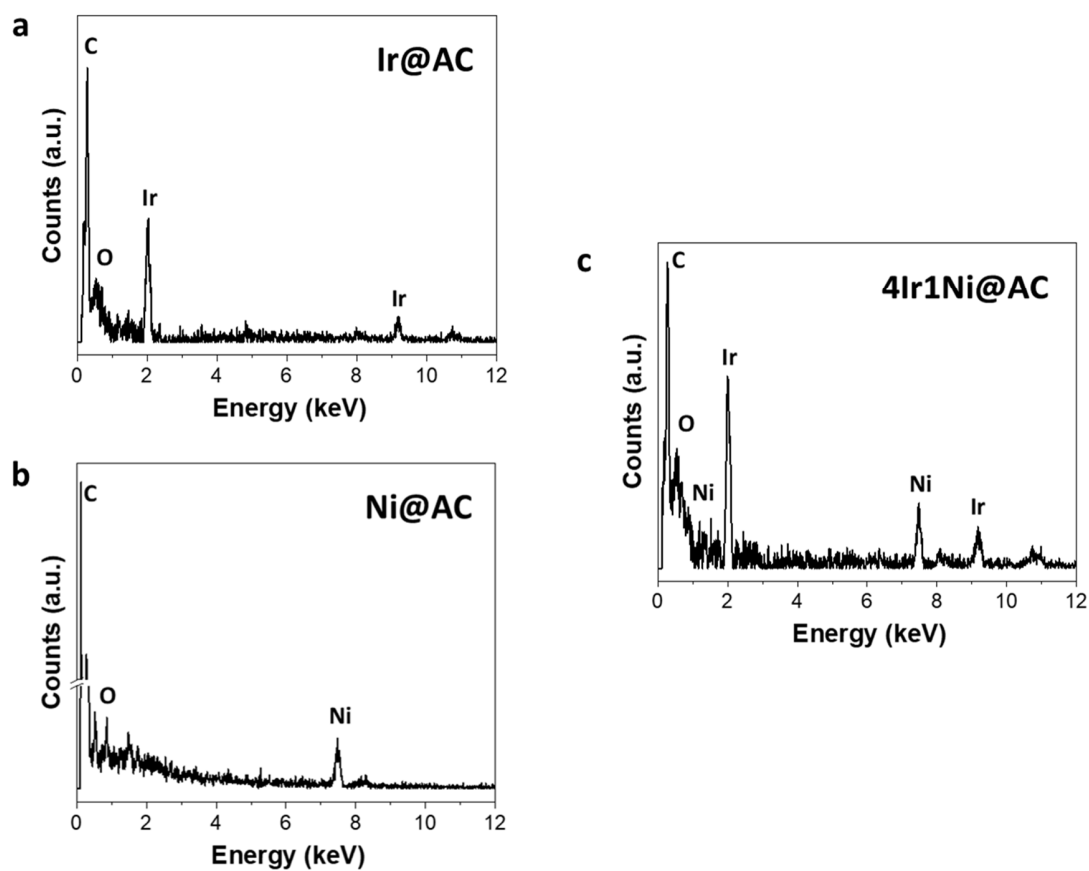

**Figure S4.** SEM-EDX spectra of (a) Ir@AC (b) Ni@AC and (c) 4Ir1Ni@AC showing the elements present in each catalyst material.



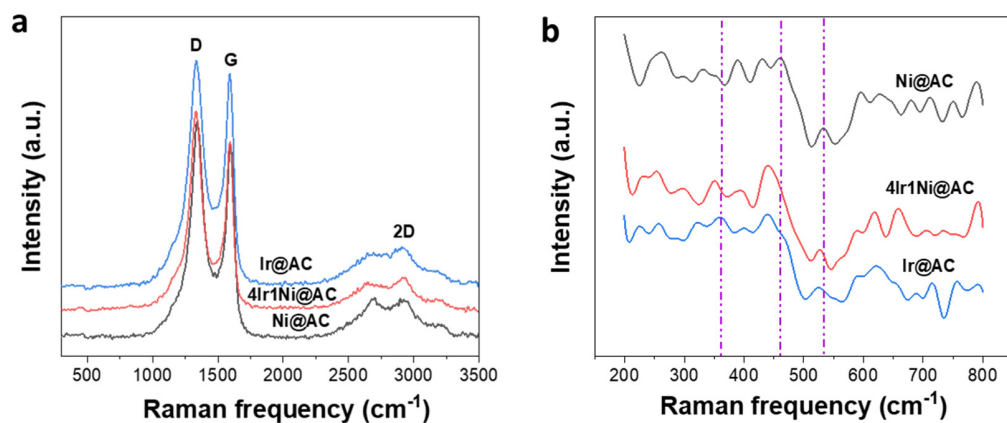

**Figure S5.** Raman spectra of Ir@AC, Ni@AC and 4Ir1Ni@AC (a) 300-3500  $\text{cm}^{-1}$  and (b) 200-800  $\text{cm}^{-1}$  frequency range

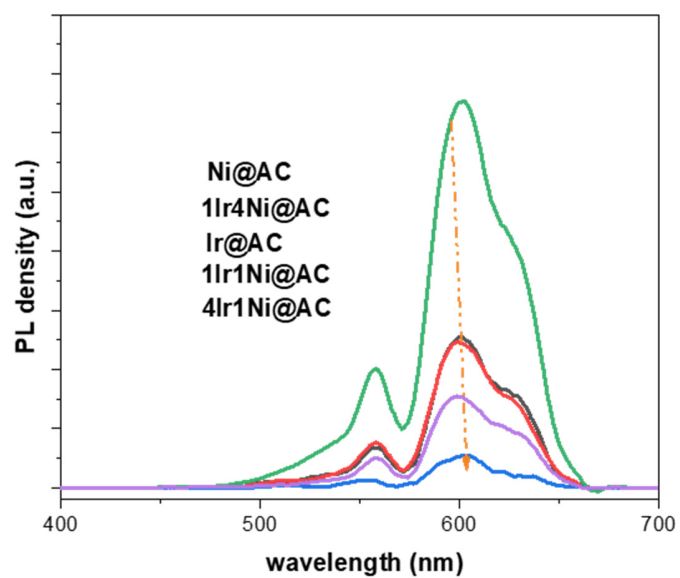

**Figure S6.** PL emission spectra of metal and alloy nanoparticles of Ir and Ni, after excitation at 350 nm.

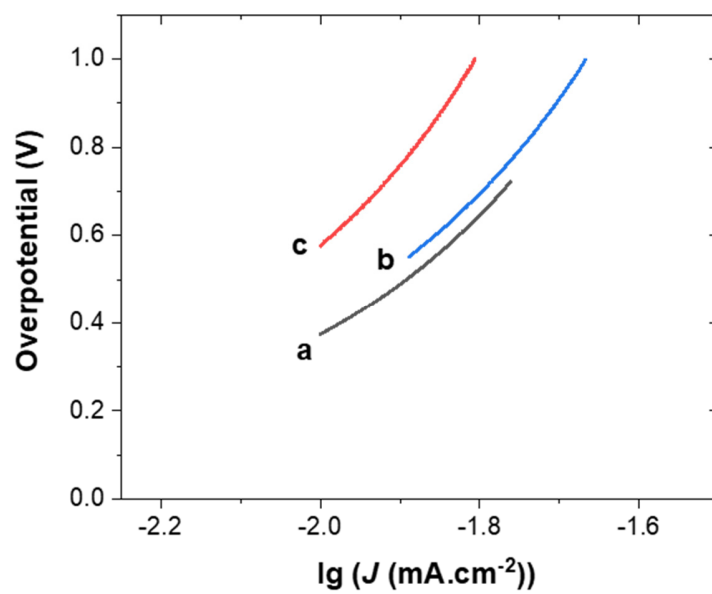

**Figure S7.** Tafel slope for HER reaction under 1.5 G AM light illumination in a. NaOH, b. Na<sub>2</sub>SO<sub>4</sub> and c. H<sub>2</sub>SO<sub>4</sub> electrolyte solutions.



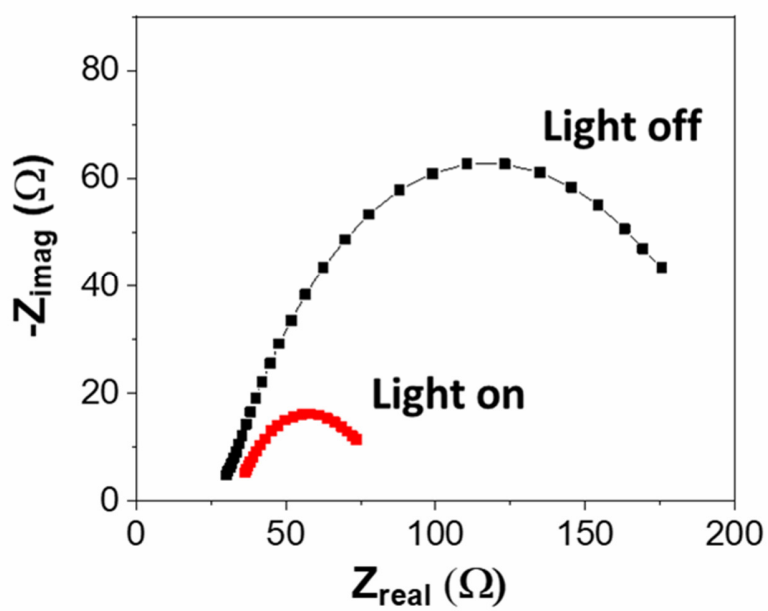

**Figure S8.** EIS spectra of 4Ir1Ni@AC electrode in 0.1 M Na<sub>2</sub>SO<sub>4</sub> electrolyte measured from 10 mHz to 100 kHz frequency range at 5 mV AC amplitude.

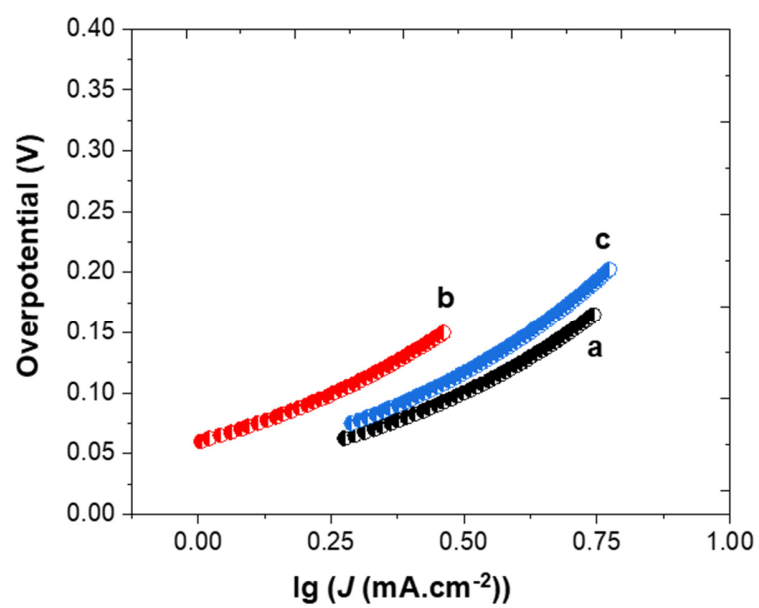

**Figure S9.** Tafel slope for OER reaction under 1.5 G AM light illumination in a. NaOH, b. Na<sub>2</sub>SO<sub>4</sub> and c. H<sub>2</sub>SO<sub>4</sub> electrolyte solutions.

**Table S1.** Relative mass ration between Ir and Ni

| alloy code | Ir: Ni weight ratio |
|------------|---------------------|
| 1Ir1Ni@AC  | <b>1.2±0.1:1</b>    |
| 1Ir4Ni@AC  | <b>1:3.5±0.2</b>    |
| 4Ir1Ni@AC  | <b>4.2±0.1:1</b>    |

**Table S2.** Summary of recently reported Ir based electrocatalysts for water splitting performance

| Reaction | Catalyst                                                         | Electrolyte             | Overpotential at 10 mA cm <sup>-2</sup> / mV | Ref                                                |
|----------|------------------------------------------------------------------|-------------------------|----------------------------------------------|----------------------------------------------------|
| HER      | Er <sub>2</sub> Si <sub>2</sub> O <sub>7</sub> :IrO <sub>2</sub> | 1.0 M KOH               | 170                                          | <i>ACS Catal.</i> <b>2018</b> , 8, 8830.           |
|          | Ir–Ni thin films                                                 | 1.0 M KOH               | 60                                           | <i>Energy Technol.</i> <b>2019</b> , 2, 442.       |
|          | Ir NPs                                                           | 1.0 M KOH               | 109                                          | <i>J. Am. Chem. Soc.</i> <b>2015</b> , 137, 4347.  |
|          | <a href="#">4Ir1Ni@AC</a>                                        | 0.1 M NaOH              | 430                                          | This work                                          |
| OER      | Ir                                                               | 1.0 M KOH               | 430                                          | <i>J. Am. Chem. Soc.</i> <b>2015</b> , 137, 4347.  |
|          | IrO <sub>x</sub>                                                 | 1.0 M NaOH              | 320                                          | <i>J. Am. Chem. Soc.</i> <b>2013</b> , 135, 16977. |
|          | Mesoporous IrO <sub>x</sub>                                      | 0.1 M NaOH              | 320                                          | <i>J. Phys. Chem. C</i> <b>2009</b> , 113, 12958.  |
|          | IrNi oxide                                                       | 0.1 M HClO <sub>4</sub> | 310                                          | <i>J. Am. Chem. Soc.</i> <b>2015</b> , 137, 13031. |
|          | <a href="#">4Ir1Ni@AC</a>                                        | 0.1 M NaOH              | 250                                          | This work                                          |
